# Supplementary material for: PHD3 regulates differentiation, tumour growth and angiogenesis in pancreatic cancer
Source: PubMed Central journal article supplement (PMC2990580; doi:10.1038/sj.bjc.6605936), 2010-10-26

# Supplemental Figure

Su et al.,

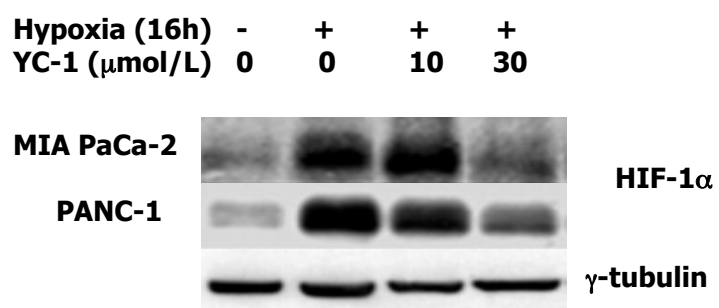

Supplement: 6605936x1.pdf [file 6605936x1.pdf]
